# Supplementary material for: Discrimination and quantification of sulfathiazole polytypes using low-frequency Raman spectroscopy
Source: Royal Society of Chemistry journal article supplement (doi:10.1039/c8ce00081f), 2018-01-01
Supplement: c8ce00081f1.pdf [file c8ce00081f1.pdf]

## Supplementary information

### Discrimination and Quantification of Sulfathiazole Polytypes Using Low-frequency Raman Spectroscopy

Kentaro Iwata, Masatoshi Karashima, Yukihiro Ikeda, Motoki Inoue and Toshiro Fukami

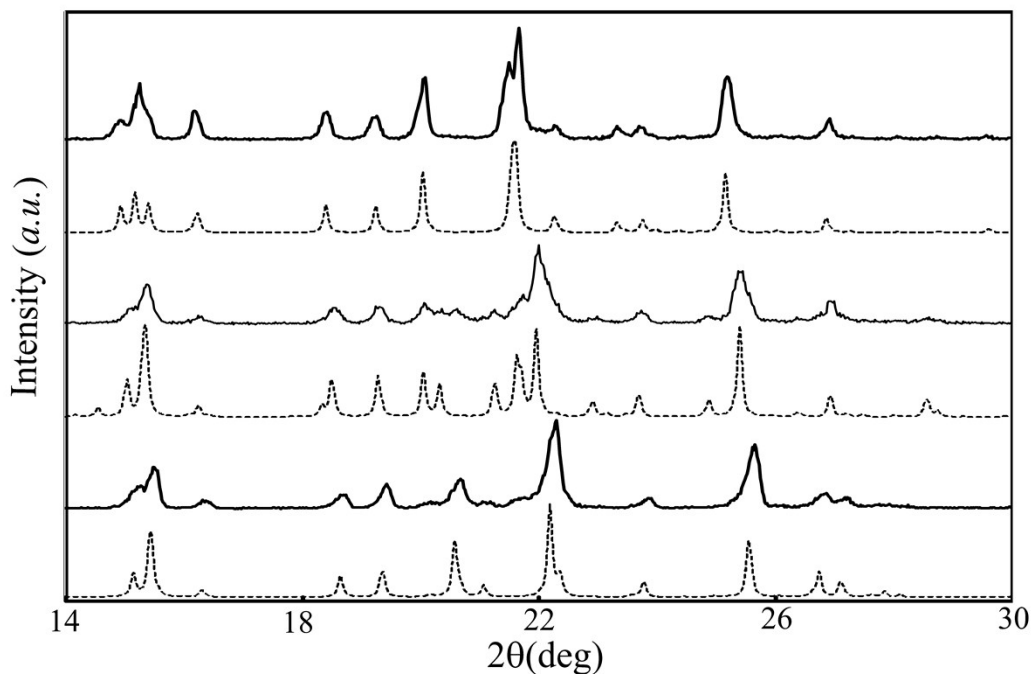

**Supplementary Information 1.** Expanded overlay of experimental (solid) and calculated (dash) PXRD patterns of Sulfathiazole Forms II, III and IV.

(a) and (b): Form II, (c) and (d): Form III, and (e) and (f): Form IV.

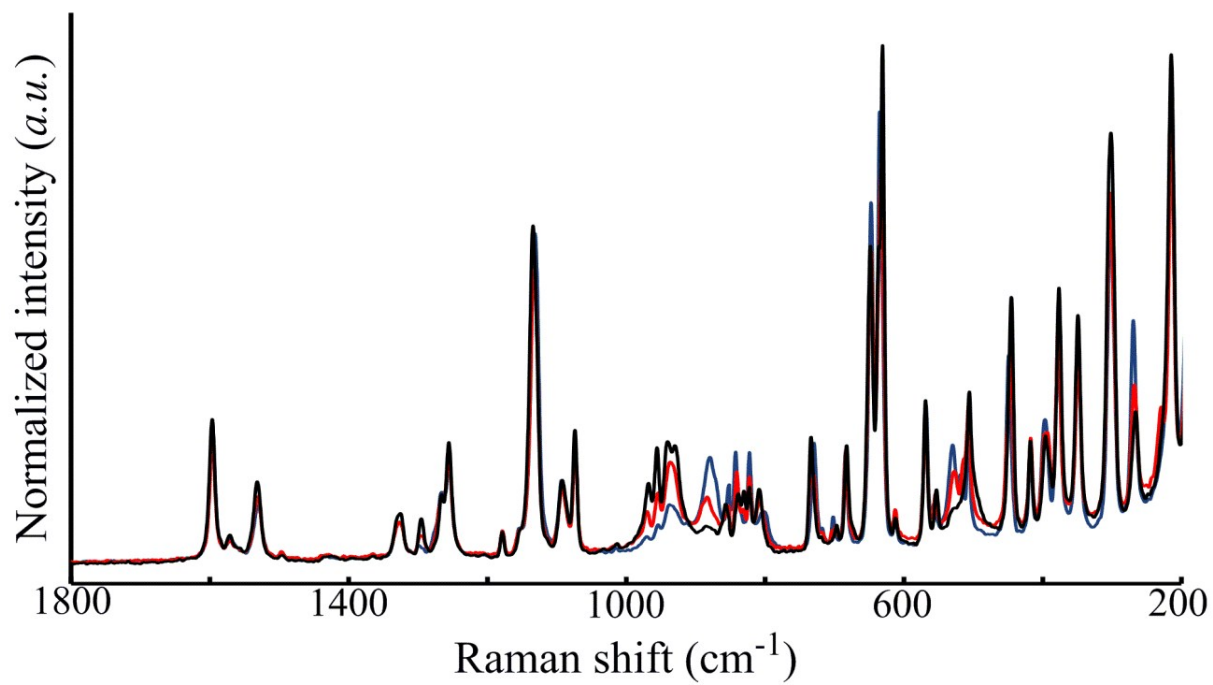

**Supplementary Information 2.** Overlaid Raman spectra of Forms II (blue), III (red) and IV (black) in the MF region.

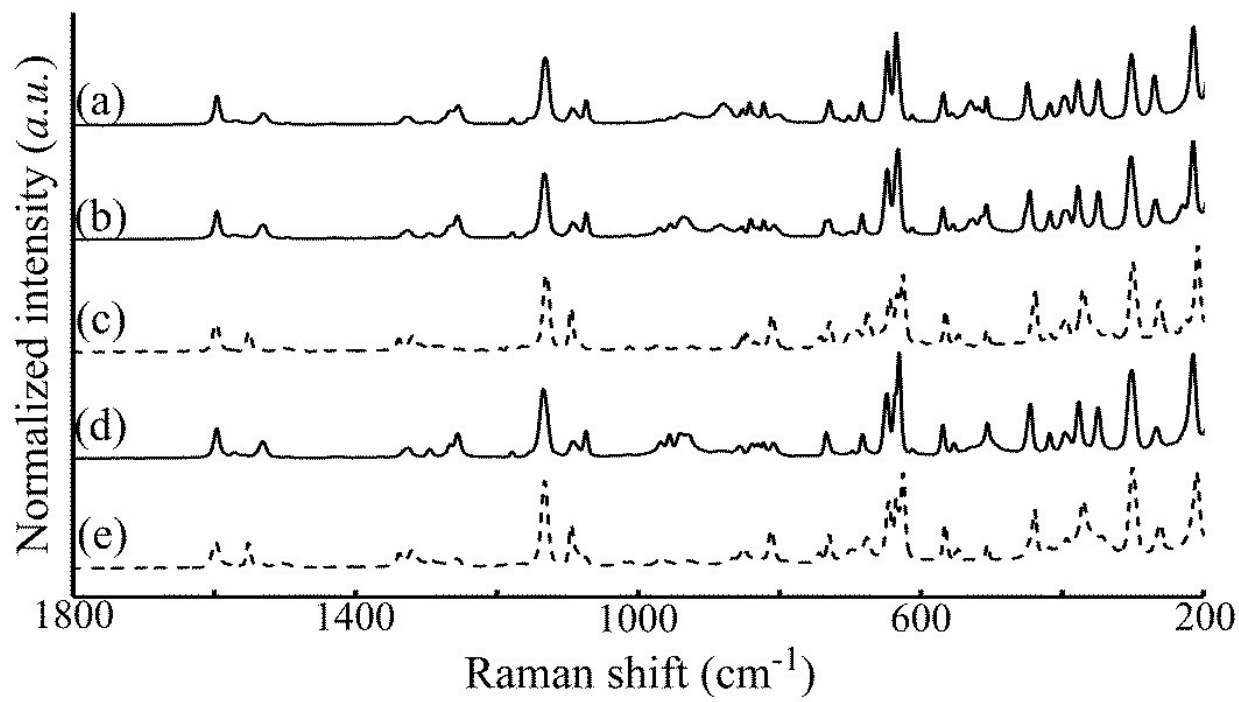

**Supplementary Information 3.** Raman spectra of Forms II, III and IV crystals (solid) and their H/D exchanged crystals (dash) in the MF region.

(a) Form II, (b) Form III, (c) H/D exchanged Form III, (d) Form IV and (e) H/D exchanged Form IV. The vertical scale is *ca.* 10 times smaller than that in the LF region.

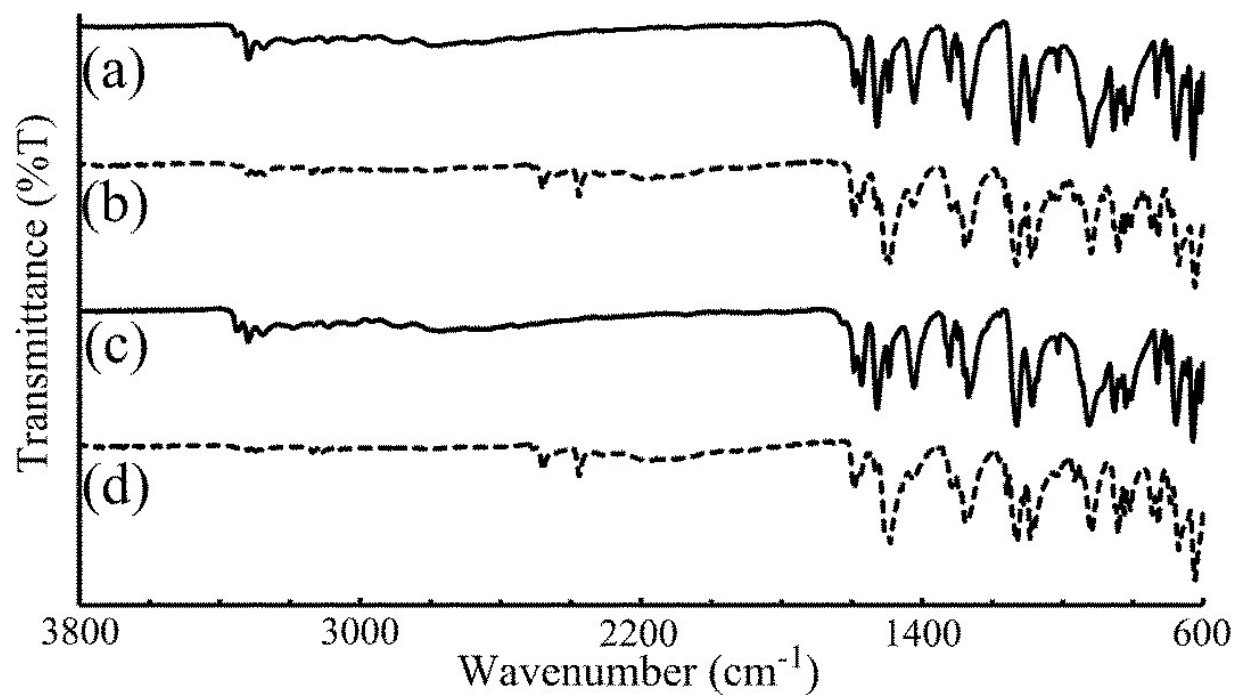

**Supplementary Information 4.** ATR FT-IR spectra of Forms III and IV crystals (solid) and their H/D exchanged crystals (dash). (a) Form III, (b) H/D exchanged Form III, (c) Form IV and (d) H/D exchanged Form IV.

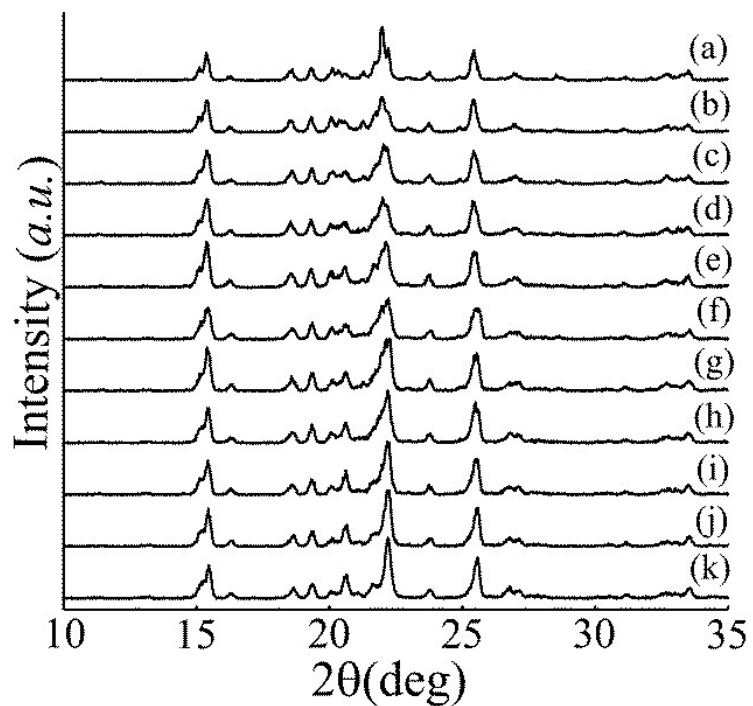

**Supplementary Information 5.** PXRD patterns of physical mixtures of forms III and IV crystals in various ratios.

The ratio of Form III : Form IV = (a) 100 : 0, (b) 90 : 10, (c) 80 : 20, (d) 70 : 30, (e) 60 : 40, (f) 50 : 50, (g) 40 : 60, (h) 30 : 70, (i) 20 : 80, (j) 10 : 90 and (k) 0 : 100.

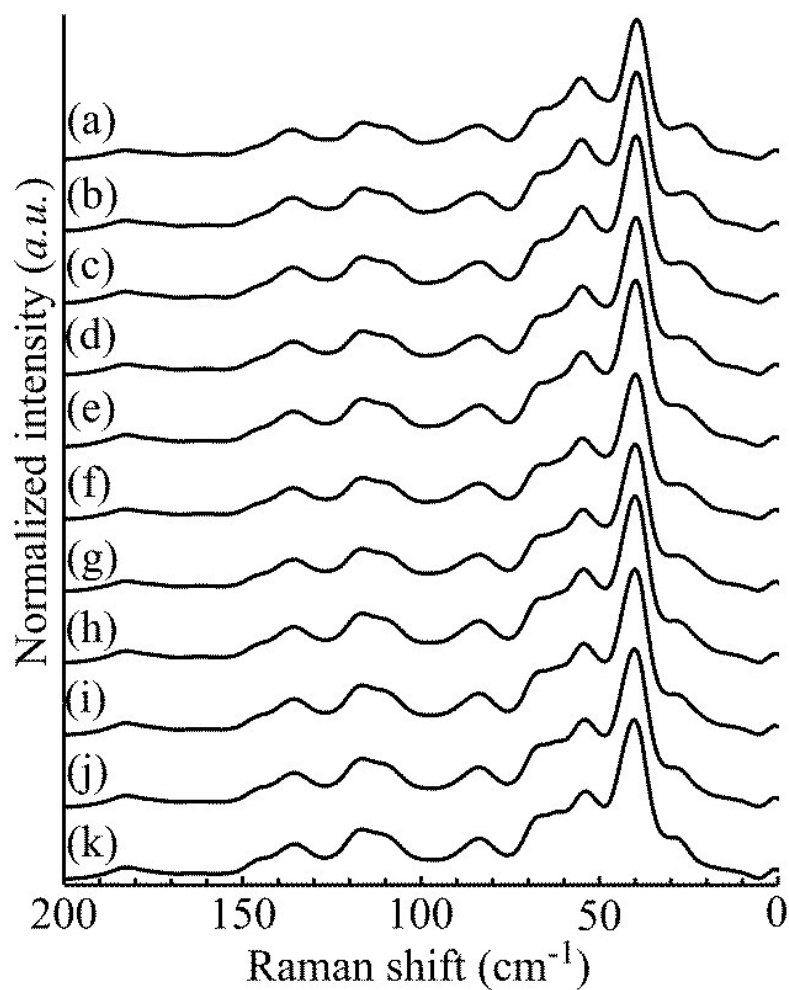

**Supplementary Information 6.** Averaged Raman spectra of the polytypic physical mixtures in the LF region.

The ratio of Form III : Form IV = (a) 100 : 0, (b) 90 : 10, (c) 80 : 20, (d) 70 : 30, (e) 60 : 40, (f) 50 : 50, (g) 40 : 60, (h) 30 : 70, (i) 20 : 80, (j) 10 : 90, and (k) 0 : 100. These Raman spectra were obtained by averaging twenty-five sub-spectra of the physical mixtures.

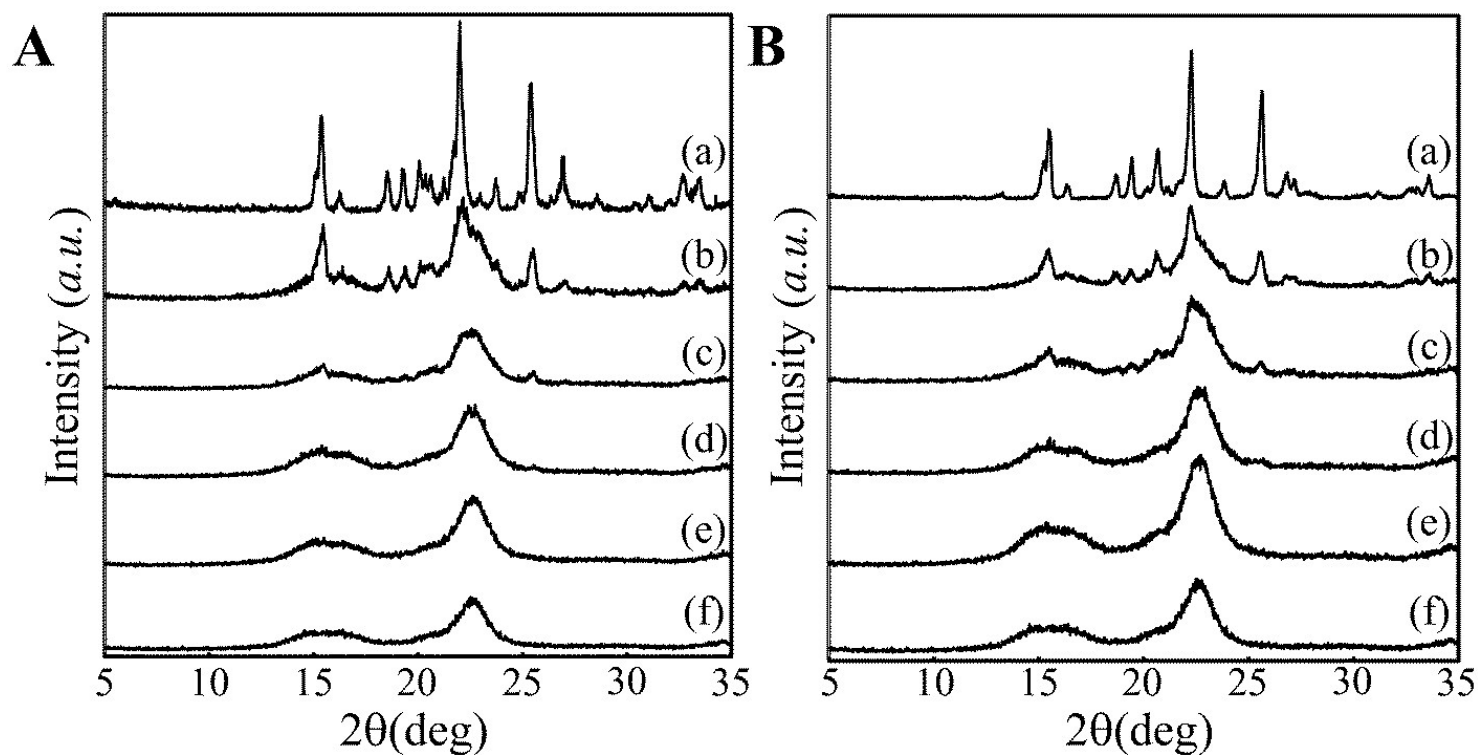

**Supplementary Information 7.** PXRD patterns of the model formulations of Forms III (A) and IV crystals (B) at various API content.

(a) 100% API powder, (b) 30% API powder, (c) 10% API powder, (d) 3% API powder, (e) 1% API powder and (f) microcrystalline cellulose powder.

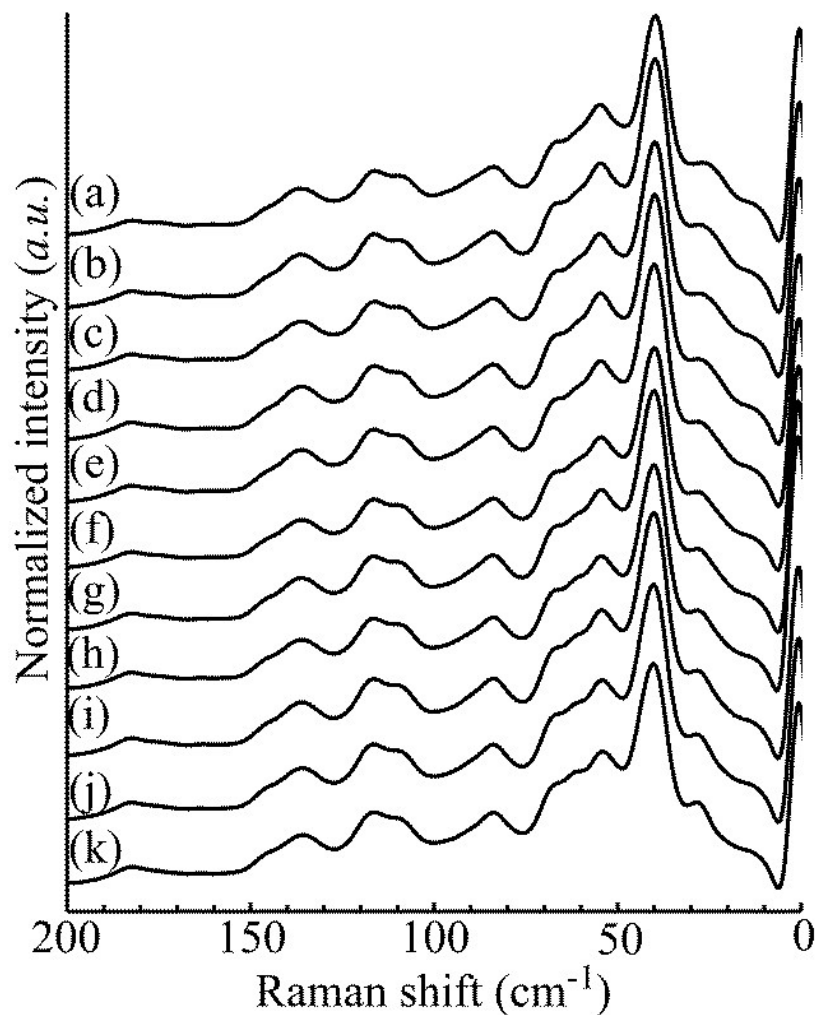

**Supplementary Information 8.** Averaged Raman spectra of the model formulations in the LF region.

The ratio of Form III : Form IV = (a) 100 : 0, (b) 90 : 10, (c) 80 : 20, (d) 70 : 30, (e) 60 : 40, (f) 50 : 50, (g) 40 : 60, (h) 30 : 70, (i) 20 : 80, (j) 10 : 90, and (k) 0 : 100. These Raman spectra were obtained by averaging twenty-five sub-spectra of the model formulations.
